# Supplementary material for: Uncovering Phytotoxic Compounds Produced by Colletotrichum spp. Involved in Legume Diseases Using an OSMAC–Metabolomics Approach
Source: MDPI journal article supplement (doi:10.3390/jof9060610), 2023-05-25
Supplement: s1 [file s1]

Original Article

# Uncovering Phytotoxic Compounds Produced by *Colletotrichum* spp. Involved in Legume Diseases Using an OSMAC–Metabolomics Approach

Pierluigi Revegilia <sup>1,†</sup>, Francisco J. Agudo-Jurado <sup>1,†</sup>, Eleonora Barilli <sup>1</sup>, Marco Masi <sup>2</sup>, Antonio Evidente <sup>2,3</sup> and Diego Rubiales <sup>1,\*</sup>

<sup>1</sup> Institute for Sustainable Agriculture, CSIC, 14004 Cordoba, Spain

<sup>2</sup> Department of Chemical Sciences, University of Naples Federico II (UNINA), 80126 Naples, Italy

<sup>3</sup> Institute of Sciences of Food Production, National Research Council (ISPA-CNR), 70125 Bari, Italy

\* Correspondence: [diego.rubiales@ias.csic.es](mailto:diego.rubiales@ias.csic.es)

† These authors contributed equally to this work.

## Supplementary material

Figure S1. m/z distribution diagrams and Base Peak Chromatograms of *C. truncatum* isolate C428 (from lentil) extracts. (a) PDA extract; (b) PDB extract; (c) Rice extract; (d) Richard extract.

Figure S2. m/z distribution diagrams and Base Peak Chromatograms of *C. truncatum* isolate C431 (from soybean) extracts. (a) PDA extract; (b) PDB extract; (c) Rice extract; (d) Richard extract.

Figure S3. m/z distribution diagrams and Base Peak Chromatograms of *C. trifolii* isolate C436 (from clover) extracts. (a) PDA extract; (b) PDB extract; (c) Rice extract; (d) Richard extract.

Figure S4. Structure of: validated metabolites with pure standards (level A; red); putatively identified and produced by *Colletotrichum* spp. (level B(i), blue); putatively identified and produced by other fungal species (level B(ii), black); Structures of Curvupallide A and B (Level C(i), brown).

Table S1. Parameters Metaboanalyst 5.0 for LC-MS spectra processing.

Table S2. Features lists transformation and scaling for PLS – DA analysis. Q2 and R2 values of PLS – DA models in cross validation.

Table S3. Metabolites dereplicated by targeted and untargeted metabolomics analysis, organised according to identification level.

Table S4. Metabolites dereplicated by targeted and untargeted metabolomics analysis, organised according to identification level.

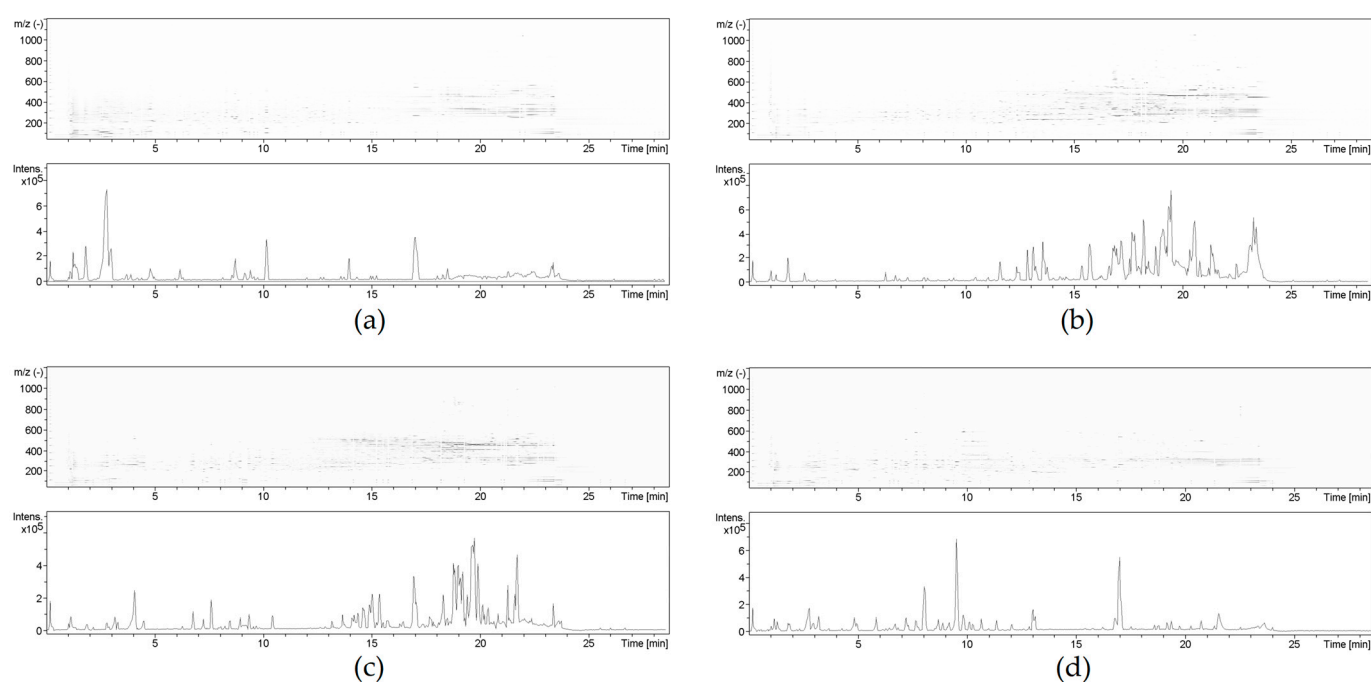

Figure S1. m/z distribution diagrams and Base Peak Chromatograms of *C. truncatum* isolate C428 (from lentil) extracts. (a) PDA extract; (b) PDB extract; (c) Rice extract; (d) Richard extract.

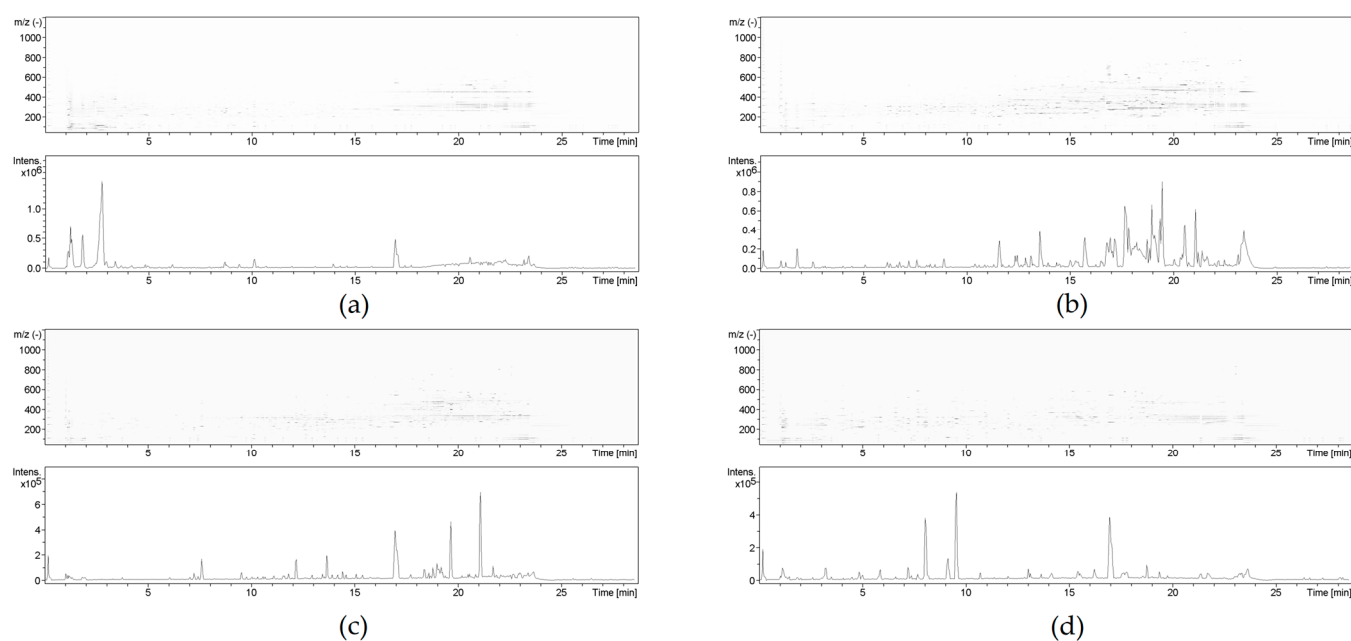

Figure S2. m/z distribution diagrams and Base Peak Chromatograms of *C. truncatum* isolate C431 (from soybean) extracts. (a) PDA extract; (b) PDB extract; (c) Rice extract; (d) Richard extract.

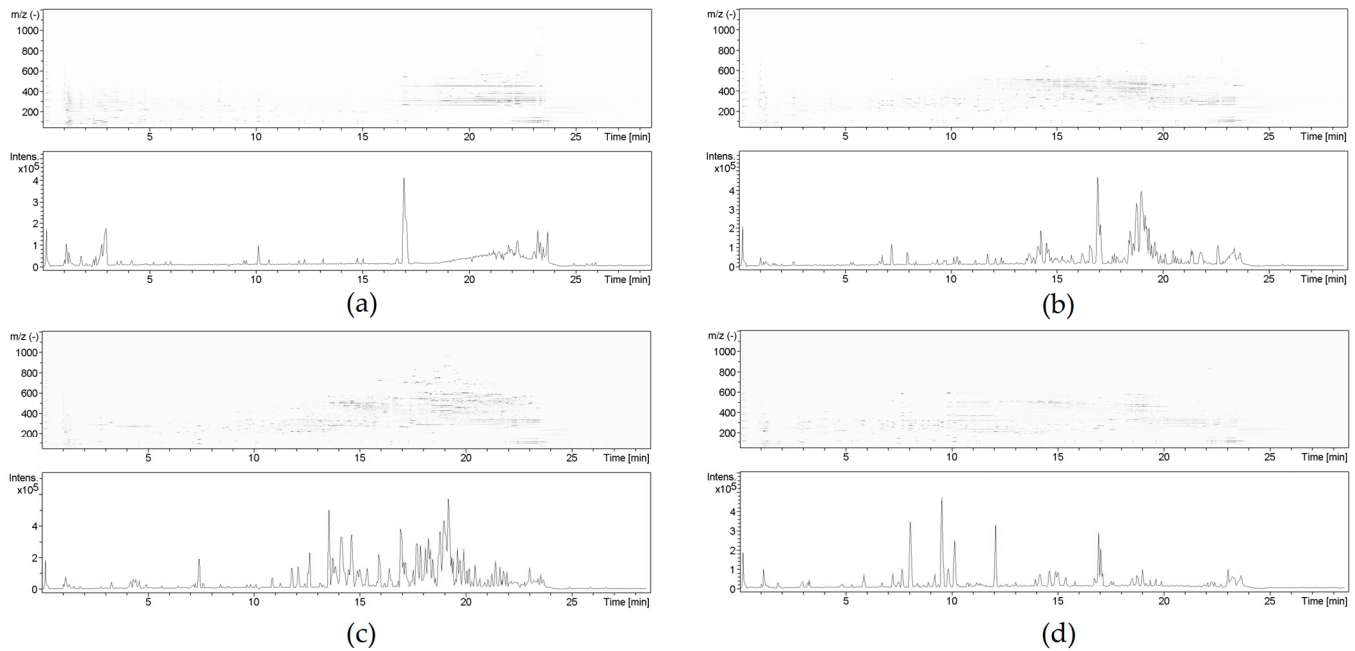

Figure S3. m/z distribution diagrams and Base Peak Chromatograms of *C. trifolii* isolate C436 (from clover) extracts. (a) PDA extract; (b) PDB extract; (c) Rice extract; (d) Richard extract.

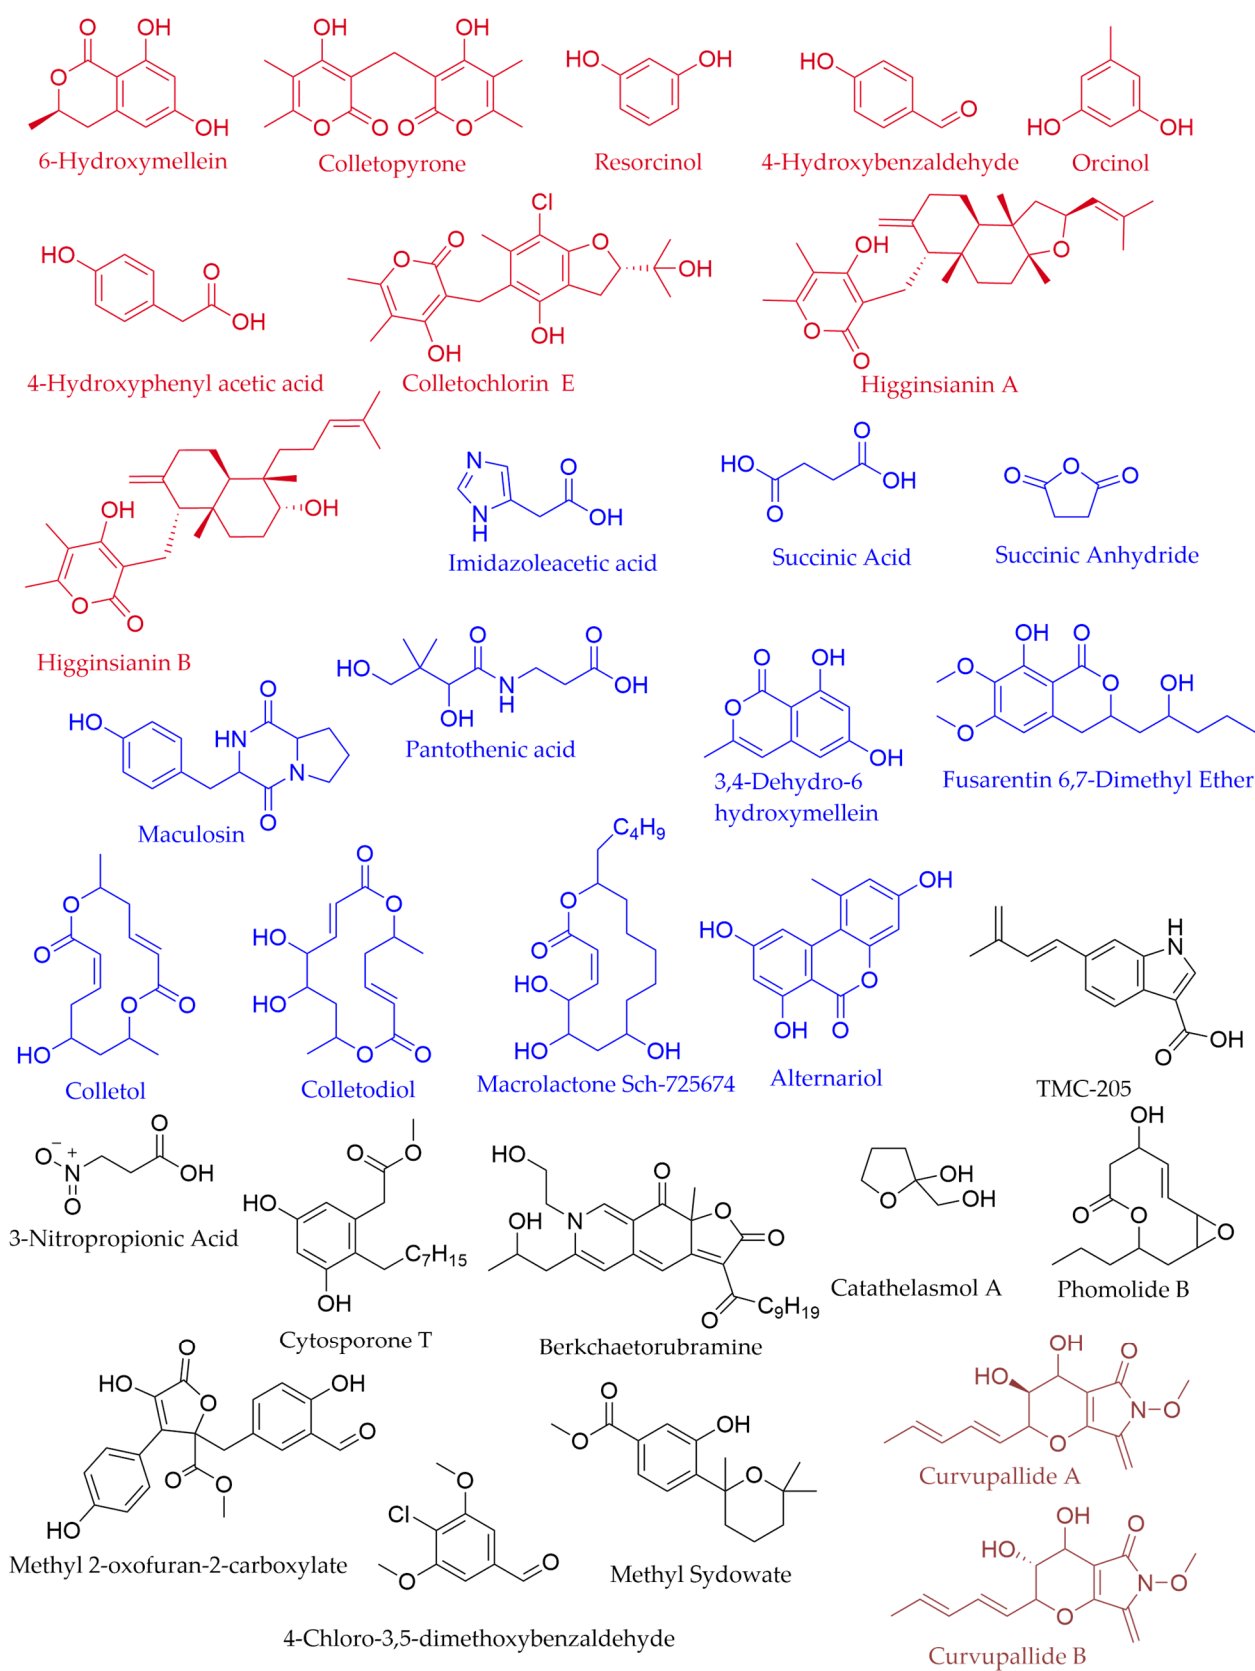

Figure S4. Structure of: validated metabolites with pure standards (level A; red); putatively identified and produced by *Colletotrichum* spp. (level B(i), blue); putatively identified and produced by other fungal species (level B(ii), black); Structures of Curvupallide A and B (level C(i), brown).

Table S1. Parameters Metaboanalyst 5.0 for LC-MS spectra processing.

| Platform selection  | Parameters                                                                                |
|---------------------|-------------------------------------------------------------------------------------------|
| UPLC-Q/TOF          | Auto-Optimized                                                                            |
| Peak Picking        | Parameters                                                                                |
| Method              | centWave                                                                                  |
| min_peakwidth       | 5.0                                                                                       |
| max_peakwidth       | 20.0                                                                                      |
| ppm                 | 15 ppm                                                                                    |
| mzdiff              | 0.01                                                                                      |
| snthresh            | 6.0                                                                                       |
| noise               | 1000.0                                                                                    |
| prefilter           | 3.0                                                                                       |
| value_of_prefilter  | 100.0                                                                                     |
| Peak Alignment      | Parameters                                                                                |
| Method              | obiwarp                                                                                   |
| Bandwidth           | 30.0                                                                                      |
| minFraction         | 0.8                                                                                       |
| minSamples          | 1                                                                                         |
| maxFeatures         | 100                                                                                       |
| integrate           | 1                                                                                         |
| extra               | 1                                                                                         |
| span                | 0.25                                                                                      |
| profStep            | 1                                                                                         |
| Peak Alignment      | Parameters                                                                                |
| Polarity            | Negative                                                                                  |
| Adducts             | [M];[M-H]; [M-2H]; [M-3H]; [M-H+Cl] <sup>2+</sup> ; [M+Cl]; [M+2Cl] <sup>2+</sup> ;[2M-H] |
| Perc_fwhm           | 0.6                                                                                       |
| Mz_abs_iso          | 0.005                                                                                     |
| Max_charge          | 2                                                                                         |
| Corr_eic_th         | 0.85                                                                                      |
| Mz_abs_add          | 0.001                                                                                     |
| Contaminant Removal | Yes                                                                                       |
| Blank Subtraction   | Yes                                                                                       |

Table S2. Features lists transformation and scaling for PLS – DA analysis. Q2 and R2 values of PLS – DA models in cross validation.

| Cultural media<br>extracts | Transformation | Scaling        | Q2 value  | R2 value  |
|----------------------------|----------------|----------------|-----------|-----------|
| PDA                        | Logarithmic    | Pareto scaling | 0.8331*   | 0.9900*   |
| PDB                        | Logarithmic    | Range scaling  | 0.9106**  | 0.9997**  |
| Rice                       | Logarithmic    | Pareto scaling | 0.9501**  | 0.9998**  |
| Richard                    | Cube root      | Autoscaling    | 0.7625*** | 0.9967*** |

\*values using the top 4 components; \*\* values using the top 5 components; \*\*\*values using the top 3 components.

Table S3. Metabolites dereplicated by targeted and untargeted metabolomics analysis, organised according to identification level.

| Putative<br>metabolite name | Biosynthetic origin and Class of compound                | Molecular<br>formula                           | Ret. Time | ES(-)<br>Theor.<br>m/z         | ES(-)<br>Found<br>m/z          | m/z<br>error<br>(mDa) | MS/MS                                         | ID<br>Levels<br>(A – D)* | Databases<br>Code**     |
|-----------------------------|----------------------------------------------------------|------------------------------------------------|-----------|--------------------------------|--------------------------------|-----------------------|-----------------------------------------------|--------------------------|-------------------------|
| 6-hydroxymellein            | Polyketides_ Isocoumarine                                | C <sub>10</sub> H <sub>10</sub> O <sub>4</sub> | 12.58     | 193.0501<br>[M-H] <sup>-</sup> | 193.0495<br>[M-H] <sup>-</sup> | 0.6                   | 149.0601;<br>131.0498;<br>105.0715            | A                        | CNP0395266<br>NPA028477 |
| Colletopyrone               | Polyketides_Cyclic polyketides                           | C <sub>15</sub> H <sub>16</sub> O <sub>6</sub> | 18.24     | 291.0869<br>[M-H] <sup>-</sup> | 291.0904<br>[M-H] <sup>-</sup> | -3.5                  | 224.0162;<br>139.0394;<br>95.0505             | A                        | CNP0267088<br>Q82653372 |
| Resorcinol                  | Shikimates and Phenylpropanoids_Simple<br>phenol         | C <sub>6</sub> H <sub>6</sub> O <sub>2</sub>   | 10.11     | 109.0289<br>[M-H] <sup>-</sup> | 109.0284<br>[M-H] <sup>-</sup> | 0.5                   | 93.0330;<br>81.0331                           | A                        | CNP0414137<br>Q82653372 |
| 4-Hydroxybenzaldehyde       | Shikimates and Phenylpropanoids_Simple<br>phenolic acids | C <sub>7</sub> H <sub>6</sub> O <sub>2</sub>   | 9.12      | 121.0289<br>[M-H] <sup>-</sup> | 121.0291<br>[M-H] <sup>-</sup> | -0.2                  | 108.0200;<br>92.0271;<br>65.0407              | A                        | CNP0230702<br>NPA032546 |
| Orcinol                     | Shikimates and Phenylpropanoids_Simple<br>phenol         | C <sub>7</sub> H <sub>8</sub> O <sub>2</sub>   | 4.76      | 123.0446<br>[M-H] <sup>-</sup> | 123.0446<br>[M-H] <sup>-</sup> | -                     | 109.0292;<br>108.0190;<br>91.0180;<br>81.0350 | A                        | CNP0300146<br>NPA032537 |
| 4-Hydroxyphenylacetic acid  | Shikimates and Phenylpropanoids_Simple<br>phenolic acids | C <sub>8</sub> H <sub>8</sub> O <sub>3</sub>   | 8.97      | 151.0395<br>[M-H] <sup>-</sup> | 151.0390<br>[M-H] <sup>-</sup> | 0.5                   | 118.8785;<br>109.0283;<br>107.049;<br>93.0333 | A                        | CNP0212603<br>NPA032547 |

|                      |                                                    |                                                               |       |                                |                                |      |                                                 |      |                         |
|----------------------|----------------------------------------------------|---------------------------------------------------------------|-------|--------------------------------|--------------------------------|------|-------------------------------------------------|------|-------------------------|
| Colletochlorin E     | Terpenoids& Polyketides_Tetraketide meroterpenoids | C <sub>20</sub> H <sub>23</sub> ClO <sub>6</sub>              | 18.72 | 393.1104<br>[M-H] <sup>-</sup> | 393.1105<br>[M-H] <sup>-</sup> | -0.1 | 241.0638;<br>151.0398;<br>139.0400;<br>95.0504  | A    | -                       |
| Higginsianin A       | Terpenoids& Polyketides_Triketide meroterpenoids   | C <sub>27</sub> H <sub>38</sub> O <sub>4</sub>                | 22.50 | 425.2692<br>[M-H] <sup>-</sup> | 425.2686<br>[M-H] <sup>-</sup> | 0.6  | 325.1839;<br>265.1463;<br>265.1478;<br>223.0281 | A    | CNP0152211<br>NPA021815 |
| Higginsianin B       | Terpenoids& Polyketides_Triketide meroterpenoids   | C <sub>27</sub> H <sub>40</sub> O <sub>4</sub>                | 22.66 | 427.2848<br>[M-H] <sup>-</sup> | 427.2843<br>[M-H] <sup>-</sup> | 0.5  | 357.2645;<br>315.2527;<br>283.2276;<br>155.0351 | A    | CNP0073478<br>NPA021814 |
| Imidazoleacetic acid | Alkaloids_Imidazole alkaloids                      | C <sub>5</sub> H <sub>6</sub> N <sub>2</sub> O <sub>2</sub>   | 3.15  | 125.0351<br>[M-H] <sup>-</sup> | 125.0350<br>[M-H] <sup>-</sup> | 0.1  | 81.04434;<br>71.6317;<br>97.0401                | B(i) | CNP0253943              |
| Maculosin            | Amino acids and Peptides_Dipeptides                | C <sub>14</sub> H <sub>16</sub> N <sub>2</sub> O <sub>3</sub> | 7.22  | 259.1083<br>[M-H] <sup>-</sup> | 259.1090<br>[M-H] <sup>-</sup> | -0.5 | 98.0251;<br>121.0293;<br>124.0398               | B(i) | CNP0320469<br>NPA007345 |
| Succinic Acid        | Fatty Acids_ Dicarboxylic acids                    | C <sub>4</sub> H <sub>6</sub> O <sub>4</sub>                  | 2.74  | 117.0188<br>[M-H] <sup>-</sup> | 117.0190<br>[M-H] <sup>-</sup> | -0.2 | 99.00871;<br>73.0295                            | B(i) | Q213050                 |
| Succinic Anhydride   | Fatty Acids_ Anhydride of dicarboxylic acid        | C <sub>4</sub> H <sub>4</sub> O <sub>3</sub>                  | 2.76  | 99.0082<br>[M-H] <sup>-</sup>  | 99.0091<br>[M-H] <sup>-</sup>  | -0.9 | 73.0138;<br>59.0155                             | B(i) | CNP0079889<br>Q417847   |
| Pantothenic acid     | Fatty acids_ Beta amino acids and derivatives      | C <sub>9</sub> H <sub>17</sub> NO <sub>5</sub>                | 4.94  | 218.1028<br>[M-H] <sup>-</sup> | 218.1038<br>[M-H] <sup>-</sup> | -1   | 88.0413;<br>99.0459;                            | B(i) | CNP0153142              |

|                               |                                   |                                                 |       |                                |                                |      |                                                 |       |                         |
|-------------------------------|-----------------------------------|-------------------------------------------------|-------|--------------------------------|--------------------------------|------|-------------------------------------------------|-------|-------------------------|
|                               |                                   |                                                 |       |                                |                                |      | 146.0810,<br>71.01495                           |       |                         |
| 3,4-Dehydro-6-hydroxymellein  | Polyketides_ Isocoumarine         | C <sub>10</sub> H <sub>8</sub> O <sub>4</sub>   | 16.10 | 191.0344<br>[M-H] <sup>+</sup> | 191.0352<br>[M-H] <sup>+</sup> | -0.8 | 149.0234;<br>147.0441;<br>123.0439;<br>87.0458  | B(i)  | CNP0389619<br>Q27105447 |
| Fusarentin 6,7-dimethyl ether | Polyketides_ Isocoumarine         | C <sub>16</sub> H <sub>22</sub> O <sub>6</sub>  | 15.70 | 309.1338<br>[M-H] <sup>+</sup> | 309.1323<br>[M-H] <sup>+</sup> | 1.5  | 265.1440;<br>253.1075;<br>233.1208;<br>125.0243 | B(i)  | CNP0219353<br>Q27138491 |
| Colletol                      | Polyketides_Macrolides            | C <sub>14</sub> H <sub>20</sub> O <sub>5</sub>  | 15.2  | 267.1235<br>[M-H] <sup>+</sup> | 267.1240<br>[M-H] <sup>+</sup> | -0.5 | 223.1343;<br>213.1496;<br>121.0296              | B(i)  | CNP0157857<br>NPA002061 |
| Colletodiol                   | Polyketides_Macrolides            | C <sub>14</sub> H <sub>20</sub> O <sub>6</sub>  | 13.7  | 283.1182<br>[M-H] <sup>+</sup> | 283.1187<br>[M-H] <sup>+</sup> | -0.5 | 111.0822;<br>253.1077;<br>207.1020;<br>239.1284 | B(i)  | Q27896955               |
| Macrolactone Sch-725674       | Polyketides_Macrolides            | C <sub>18</sub> H <sub>32</sub> O <sub>5</sub>  | 18.4  | 327.2172<br>[M-H] <sup>+</sup> | 327.2179<br>[M-H] <sup>+</sup> | -0.7 | 209.1179;<br>227.1282;<br>293.1770              | B(i)  | CNP0221935<br>NPA008159 |
| Alternariol                   | Polyketides_Isocoumarine          | C <sub>14</sub> H <sub>10</sub> O <sub>5</sub>  | 17.53 | 257.0450<br>[M-H] <sup>+</sup> | 257.0457<br>[M-H] <sup>+</sup> | -0.7 | 111.0087;<br>213.0557;<br>68.9974               | B(i)  | CNP0184929<br>NPA020438 |
| TMC-205                       | Alkaloids_Simple indole alkaloids | C <sub>14</sub> H <sub>13</sub> NO <sub>2</sub> | 4.83  | 226.0868<br>[M-H] <sup>+</sup> | 226.0884<br>[M-H] <sup>+</sup> | -1.6 | 121.0294;<br>135.0440<br>167.0367               | B(ii) | CNP0402436<br>NPA017297 |

|                       |                                  |                                                 |       |                                |                                |      |                                                                                      |       |                         |
|-----------------------|----------------------------------|-------------------------------------------------|-------|--------------------------------|--------------------------------|------|--------------------------------------------------------------------------------------|-------|-------------------------|
| 3-Nitropropionic Acid | Fatty Acids_Oxo fatty acids      | C <sub>3</sub> H <sub>5</sub> NO <sub>4</sub>   | 2.73  | 118.0140<br>[M-H] <sup>−</sup> | 118.0145<br>[M-H] <sup>−</sup> | -0.5 | 99.0075;<br>73.0281;<br>61.9896                                                      | B(ii) | CNP0439550<br>NPA007876 |
| Cytosporone T         | Polyketides_Aromatic polyketides | C <sub>17</sub> H <sub>26</sub> O <sub>4</sub>  | 19.30 | 293.1752<br>[M-H] <sup>−</sup> | 293.1762<br>[M-H] <sup>−</sup> | -1   | 275.16412;<br>221.15503;<br>236.10591;<br>83.05134;<br>149.09648                     | B(ii) | CNP0264849<br>NPA018477 |
| Berkchaetorubramine   | Polyketides_Azaphilones          | C <sub>27</sub> H <sub>37</sub> NO <sub>6</sub> | 20.34 | 470.2543<br>[M-H] <sup>−</sup> | 470.2549<br>[M-H] <sup>−</sup> | -0.6 | 414.1930;<br>301.1450;<br>251.1654;<br>111.0095                                      | B(ii) | CNP0357282<br>NPA004011 |
| Catathelasmol A       | Polyketides_furans               | C <sub>5</sub> H <sub>10</sub> O <sub>3</sub>   | 4.58  | 117.0552<br>[M-H] <sup>−</sup> | 117.0553<br>[M-H] <sup>−</sup> | -0.1 | 101.0246;<br>85.0300;<br>73.0304;<br>68.0517                                         | B(ii) | CNP0357577<br>NPA010903 |
| Phomolide B           | Polyketides_Macrolides           | C <sub>12</sub> H <sub>18</sub> O <sub>4</sub>  | 16.08 | 225.1127<br>[M-H] <sup>−</sup> | 225.1134<br>[M-H] <sup>−</sup> | -0.7 | 137.0970;<br>89.0248;<br>151.0764;<br>121.0295;<br>127.0764;<br>195.0647;<br>68.9970 | B(ii) | CNP0206816<br>NPA005349 |

|                                                                                                                |                                                       |                                                 |       |                                |                                |      |                                                                           |       |                         |
|----------------------------------------------------------------------------------------------------------------|-------------------------------------------------------|-------------------------------------------------|-------|--------------------------------|--------------------------------|------|---------------------------------------------------------------------------|-------|-------------------------|
| Methyl 2-[(3-formyl-4-hydroxyphenyl)methyl]-4-hydroxy-3-(4-hydroxyphenyl)-5-oxo-2,5-dihydrofuran-2-carboxylate | Shikimates and Phenylpropanoids_Lignans               | C <sub>20</sub> H <sub>16</sub> O <sub>8</sub>  | 16.5  | 351.0869<br>[M-H] <sup>-</sup> | 383.0772<br>[M-H] <sup>-</sup> | -0.5 | 339.0872;<br>157.0136;<br>95.0550;<br>89.0252                             | B(ii) | CNP0354744<br>NPA014159 |
| 4-hloro-3,5-dimethoxybenzaldehyde                                                                              | Shikimates and Phenylpropanoids_Simple phenolic acids | C <sub>9</sub> H <sub>9</sub> ClO <sub>3</sub>  | 3.02  | 199.0162<br>[M-H] <sup>-</sup> | 199.0127<br>[M-H] <sup>-</sup> | 3.5  | 135.04427;<br>121.0297;<br>93.03511                                       | B(ii) | CNP0247714<br>NPA002948 |
| (+)-Methyl Sydowate                                                                                            | Terpenoids_Sesquiterpenoids                           | C <sub>16</sub> H <sub>22</sub> O <sub>4</sub>  | 17.00 | 277.1439<br>[M-H] <sup>-</sup> | 277.1446<br>[M-H] <sup>-</sup> | -0.7 | 134.0379;<br>127.1134;<br>121.0300;<br>111.0092;<br>77.0408               | B(ii) | CNP0134087<br>NPA010996 |
| Curvupallide A or B                                                                                            | Polyketides_ Isoindolazinfuranones                    | C <sub>14</sub> H <sub>17</sub> NO <sub>5</sub> | 10.41 | 278.1028<br>[M-H] <sup>-</sup> | 278.1035<br>[M-H] <sup>-</sup> | -0.7 | 205.0868;<br>248.0924;<br>163.0757;<br>178.0858;<br>124.0402;<br>135.0445 | C(i)  | NPA004814/<br>NPA015714 |
| 3-Hydroxydodecanedioic acid; Dibutyl malate;                                                                   | Fatty Acids_ Dicarboxylic acids                       | C <sub>12</sub> H <sub>22</sub> O <sub>5</sub>  | 11.0  | 245.1389<br>[M-H] <sup>-</sup> | 245.1395<br>[M-H] <sup>-</sup> | -0.6 | 173.0810;<br>111.0818;<br>141.0919;<br>103.0509                           | C(i)  | -                       |
| Fumaric acid; Maleic acid;                                                                                     | Fatty Acids_ Dicarboxylic acids                       | C <sub>4</sub> H <sub>4</sub> O <sub>4</sub>    | 2.56  | 115.0031<br>[M-H] <sup>-</sup> | 115.0033<br>[M-H] <sup>-</sup> | -0.2 | 87.0091;<br>71.0139                                                       | C(i)  | -                       |

|                                                           |                                                  |                                                               |       |                                |                                |      |                                                   |       |   |
|-----------------------------------------------------------|--------------------------------------------------|---------------------------------------------------------------|-------|--------------------------------|--------------------------------|------|---------------------------------------------------|-------|---|
| Dihydroxybutyric acid                                     | Fatty Acids_Dihydroxy Fatty acid                 | C <sub>4</sub> H <sub>8</sub> O <sub>4</sub>                  | 1.26  | 119.0344<br>[M-H] <sup>-</sup> | 119.0346<br>[M-H] <sup>-</sup> | -0.2 | 71.01505;<br>86.02505;<br>101.02489               | C(i)  | - |
| Hydroxybutyric acid                                       | Fatty Acids_Hydroxy Fatty acid                   | C <sub>4</sub> H <sub>8</sub> O <sub>3</sub>                  | 2.95  | 103.0395<br>[M-H] <sup>-</sup> | 103.0402<br>[M-H] <sup>-</sup> | -0.7 | 57.0366;<br>74.0233;<br>85.02810;<br>101.0232     | C(i)  | - |
| Trihydroxy octadecenoic acid                              | Fatty Acids_Long Chain Fatty Acids               | C <sub>18</sub> H <sub>34</sub> O <sub>5</sub>                | 17.54 | 329.2328<br>[M-H] <sup>-</sup> | 329.2335<br>[M-H] <sup>-</sup> | 0.7  | 229.14413;<br>211.1333;<br>171.1020;<br>162.02217 | C(i)  | - |
| p-Cresol; m-Cresol; o-Cresol;<br>Benzyl alcohol; Anisole; | Shikimates and Phenylpropanoids_Simple<br>phenol | C <sub>7</sub> H <sub>8</sub> O                               | 10.1  | 107.0497<br>[M-H] <sup>-</sup> | 107.0504<br>[M-H] <sup>-</sup> | -0.7 | 85.0304;<br>79.0540;<br>65.0380                   | C(i)  | - |
| 2,5-Dimethylfuran;<br>2-Ethylfuran                        | Polyketides_Furans                               | C <sub>6</sub> H <sub>8</sub> O                               | 7.41  | 95.0497<br>[M-H] <sup>-</sup>  | 95.0508<br>[M-H] <sup>-</sup>  | -1.1 | 82.0305;<br>68.9968;<br>55.0207                   | C(i)  | - |
| Putative jasmonic acid derivative                         | Fatty acids_Octadecanoids_Jasmonic acids         | C <sub>12</sub> H <sub>20</sub> O <sub>3</sub>                | 19.0  | 211.1334<br>[M-H] <sup>-</sup> | 211.1340<br>[M-H] <sup>-</sup> | -0.6 | 111.0091;<br>151.0762;<br>149.0458                | C(ii) | - |
| Putative colletotryptin                                   | Alkaloids_Tryptophan alkaloids                   | C <sub>20</sub> H <sub>22</sub> N <sub>2</sub> O <sub>5</sub> | 14.1  | 369.1450<br>[M-H] <sup>-</sup> | 369.1457<br>[M-H] <sup>-</sup> | -0.7 | 325.1548;<br>255.0776;<br>221.0931                | C(ii) | - |
| Putative glycosylamine                                    | Carbohydrates and carbohydrate conjugate         | C <sub>10</sub> H <sub>14</sub> N <sub>2</sub> O <sub>5</sub> | 3.21  | 241.0824<br>[M-H] <sup>-</sup> | 241.0832<br>[M-H] <sup>-</sup> | -0.8 | 223.0721;<br>197.0935;<br>144.0658;<br>145.0501   | C(ii) | - |

|                             |                                                 |                                                                 |       |                                |                                |      |                                                              |       |   |
|-----------------------------|-------------------------------------------------|-----------------------------------------------------------------|-------|--------------------------------|--------------------------------|------|--------------------------------------------------------------|-------|---|
| Putative hypoxanthine       | Alkaloids _Hypoxanthines                        | C <sub>8</sub> H <sub>11</sub> N <sub>5</sub> O <sub>3</sub>    | 4.83  | 225.0862<br>[M] <sup>+</sup>   | 225.0885<br>[M] <sup>+</sup>   | -2.3 | 165.0653;<br>88.0413;<br>82.0306;<br>131.0347;<br>113.0606   | C(ii) | - |
| Putative colletopeptide     | Cyclic peptides _Depsipeptides                  | C <sub>25</sub> H <sub>29</sub> N <sub>5</sub> O <sub>7</sub>   | 14.14 | 510.1989<br>[M-H] <sup>+</sup> | 510.1978<br>[M-H] <sup>+</sup> | 1.1  | 494.2041;<br>448.1982;<br>281.1398;<br>162.0547              | C(ii) | - |
| Putative colletopeptide     | Cyclic peptides _Depsipeptides                  | C <sub>26</sub> H <sub>29</sub> N <sub>3</sub> O <sub>6</sub>   | 18.31 | 478.1978<br>[M-H] <sup>+</sup> | 478.2036<br>[M-H] <sup>+</sup> | 5.0  | 448.1977;<br>281.1394;<br>267.1588                           | C(ii) | - |
| Putative colletopeptide     | Cyclic peptides _Depsipeptides                  | C <sub>28</sub> H <sub>42</sub> N <sub>4</sub> O <sub>5</sub>   | 21.70 | 513.3077<br>[M-H] <sup>+</sup> | 513.3071<br>[M-H] <sup>+</sup> | 0.6  | 423.2756;<br>358.2028;<br>297.2437                           | C(ii) | - |
| Putative colletopeptide     | Cyclic peptides _Depsipeptides                  | C <sub>29</sub> H <sub>45</sub> N <sub>5</sub> O <sub>5</sub>   | 17.9  | 542.3342<br>[M-H] <sup>+</sup> | 542.3335<br>[M-H] <sup>+</sup> | 0.7  | 527.3226;<br>515.3228;<br>501.3428;<br>499.3272;<br>489.2980 | C(ii) | - |
| Putative colletopeptide     | Cyclic peptides _Depsipeptides                  | C <sub>31</sub> H <sub>33</sub> N <sub>3</sub> O <sub>7</sub> S | 9.82  | 590.1961<br>[M-H] <sup>+</sup> | 590.1953<br>[M-H] <sup>+</sup> | 0.8  | 502.1041;<br>444.0982;<br>275.1383;<br>178.0865              | C(ii) | - |
| Putative benzene derivative | Benzenoids _Benzene and substituted derivatives | C <sub>20</sub> H <sub>18</sub> O <sub>3</sub>                  | 9.51  | 305.1178<br>[M-H] <sup>+</sup> | 305.1144<br>[M-H] <sup>+</sup> | 3.4  | 261.1863;<br>305.1752;<br>155.0141;                          | C(ii) | - |

|                                        |                                                                    |                                                 |       |                                |                                |      |                                                              |       |   |
|----------------------------------------|--------------------------------------------------------------------|-------------------------------------------------|-------|--------------------------------|--------------------------------|------|--------------------------------------------------------------|-------|---|
|                                        |                                                                    |                                                 |       |                                |                                |      | 111.0094                                                     |       |   |
| Putative O-glycosil compound           | Carbohydrates and carbohydrate conjugate_O-glycosil compounds      | C <sub>12</sub> H <sub>18</sub> O <sub>9</sub>  | 4.77  | 305.0873<br>[M-H] <sup>-</sup> | 305.0880<br>[M-H] <sup>-</sup> | -0.7 | 306.8868;<br>225.0893;<br>181.1003;<br>131.0336<br>82.0305   | C(ii) | - |
| Putative O-glycosil compound           | Carbohydrates and carbohydrate conjugate_O-glycosil compounds      | C <sub>16</sub> H <sub>28</sub> O <sub>6</sub>  | 11.5  | 315.1808<br>[M-H] <sup>-</sup> | 315.1812<br>[M-H] <sup>-</sup> | -0.4 | 283.1550;<br>211.0609;<br>68.9967                            | C(ii) | - |
| Putative phenolic glycoside            | Carbohydrates and carbohydrate conjugate_Phenolic glycosides       | C <sub>15</sub> H <sub>19</sub> NO <sub>8</sub> | 9.78  | 340.1032<br>[M-H] <sup>-</sup> | 340.1035<br>[M-H] <sup>-</sup> | -0.3 | 294.0978;<br>221.0702;<br>192.0661;<br>138.0202;<br>108.0457 | C(ii) | - |
| Putative mycosporine                   | Amino acids and Peptides_ Mycosporine derivatives                  | C <sub>15</sub> H <sub>17</sub> NO <sub>6</sub> | 6.16  | 306.0977<br>[M-H] <sup>-</sup> | 306.0984<br>[M-H] <sup>-</sup> | -0.7 | 260.1046;<br>121.02924;<br>124.0404                          | C(ii) |   |
| Putative tricarboxylic acid derivative | Carboxylic acid and derivatives_tricarboxylic acid and derivatives | C <sub>12</sub> H <sub>20</sub> O <sub>7</sub>  | 17.54 | 275.1131<br>[M-H] <sup>-</sup> | 275.1137<br>[M-H] <sup>-</sup> | -0.6 | 238.0693;<br>214.0169;<br>129.0194;<br>112.9852              | C(ii) | - |
| Putative cyclic fatty acyl glycosides  | Fatty Acids_ Fatty acyl glycosides                                 | C <sub>28</sub> H <sub>48</sub> O <sub>9</sub>  | 21.31 | 527.3220<br>[M-H] <sup>-</sup> | 527.3223<br>[M-H] <sup>-</sup> | -0.3 | 470.2545;<br>400.2484;<br>348.2541;                          | C(ii) | - |

|                                          |                                                         |                                                              |       |                    |                    |      |            |       |   |
|------------------------------------------|---------------------------------------------------------|--------------------------------------------------------------|-------|--------------------|--------------------|------|------------|-------|---|
|                                          |                                                         |                                                              |       |                    |                    |      | 279.2345;  |       |   |
|                                          |                                                         |                                                              |       |                    |                    |      | 148.9299;  |       |   |
|                                          |                                                         |                                                              |       |                    |                    |      | 263.0919;  |       |   |
|                                          |                                                         |                                                              |       |                    |                    |      | 189.0532   |       |   |
| Putative isocoumarine                    | Polyketides_ Isocoumarine                               | C <sub>11</sub> H <sub>11</sub> ClO <sub>5</sub>             | 2.76  | 257.0217           | 257.0252           | -3.5 | 103.0389;  | C(ii) | - |
|                                          |                                                         |                                                              |       | [M-H] <sup>-</sup> | [M-H] <sup>-</sup> |      | 89.02373;  |       |   |
|                                          |                                                         |                                                              |       |                    |                    |      | 73.03042   |       |   |
| Putative aromatic polyketide             | Polyketides_Aromatic Polyketides                        | C <sub>16</sub> H <sub>16</sub> O <sub>5</sub>               | 4.47  | 287.0919           | 287.0885           | 3.4  | 107.05028; | C(ii) | - |
|                                          |                                                         |                                                              |       | [M-H] <sup>-</sup> | [M-H] <sup>-</sup> |      | 96.95872;  |       |   |
|                                          |                                                         |                                                              |       |                    |                    |      | 79.95595   |       |   |
| Putative polycyclic aromatic polyketides | Polyketides_Polycyclic aromatic polyketides             | C <sub>18</sub> H <sub>12</sub> O <sub>8</sub>               | 16.80 | 355.0454           | 355.0459           | -0.5 | 341.0662;  | C(ii) | - |
|                                          |                                                         |                                                              |       | [M-H] <sup>-</sup> | [M-H] <sup>-</sup> |      | 271.1446;  |       |   |
|                                          |                                                         |                                                              |       |                    |                    |      | 244.1556   |       |   |
| Putative zearalenones                    | Polyketides_Zearalenones                                | C <sub>16</sub> H <sub>30</sub> O <sub>6</sub>               | 14.20 | 317.1964           | 317.1967           | -0.3 | 148.92999; | C(ii) | - |
|                                          |                                                         |                                                              |       | [M-H] <sup>-</sup> | [M-H] <sup>-</sup> |      | 263.09186; |       |   |
|                                          |                                                         |                                                              |       |                    |                    |      | 189.0532;  |       |   |
|                                          |                                                         |                                                              |       |                    |                    |      | 116.0503   |       |   |
| Putative β amino acid derivative         | Beta amino acids and derivatives                        | C <sub>9</sub> H <sub>12</sub> N <sub>2</sub> O <sub>4</sub> | 3.67  | 211.0718           | 211.0727           | -0.9 | 167.0816;  | C(ii) |   |
|                                          |                                                         |                                                              |       | [M-H] <sup>-</sup> | [M-H] <sup>-</sup> |      | 114.0196;  |       |   |
|                                          |                                                         |                                                              |       |                    |                    |      | 102.9327;  |       |   |
|                                          |                                                         |                                                              |       |                    |                    |      | 70.0304    |       |   |
| Putative phenolic acid                   | Shikimates and Phenylpropanoids_ Phenolic acids (C6-C1) | C <sub>17</sub> H <sub>17</sub> NO <sub>3</sub>              | 4.76  | 282.1130           | 282.1096           | 3.4  | 192.0671;  | C(ii) | - |
|                                          |                                                         |                                                              |       | [M-H] <sup>-</sup> | [M-H] <sup>-</sup> |      | 92.05122;  |       |   |
|                                          |                                                         |                                                              |       |                    |                    |      | 148.0767   |       |   |

|                                  |                                                       |                                                  |       |                                |                                |      |                                                              |       |   |
|----------------------------------|-------------------------------------------------------|--------------------------------------------------|-------|--------------------------------|--------------------------------|------|--------------------------------------------------------------|-------|---|
| Putative phenolic acid           | Shikimates and Phenylpropanoids_Simple phenolic acids | C <sub>9</sub> H <sub>9</sub> NO <sub>4</sub>    | 7.23  | 194.0453<br>[M-H] <sup>-</sup> | 194.0463<br>[M-H] <sup>-</sup> | -1   | 150.0561;<br>137.0240;<br>108.0460;<br>107.0377              | C(ii) | - |
| Putative phenylethanoid          | Shikimates and Phenylpropanoids_Phenylethanoids       | C <sub>21</sub> H <sub>32</sub> O <sub>12</sub>  | 18.75 | 476.1893<br>[M-H] <sup>-</sup> | 476.1926<br>[M-H] <sup>-</sup> | -3.3 | 460.1980;<br>430.1876;<br>237.1130;<br>149.0462              | C(ii) | - |
| Putative anisol                  | Benzenoids _Anisoles                                  | C <sub>24</sub> H <sub>31</sub> NO <sub>8</sub>  | 19.32 | 460.1971<br>[M-H] <sup>-</sup> | 460.1978<br>[M-H] <sup>-</sup> | -0.7 | 414.1924;<br>384.1817;<br>366.1709;<br>309.1538;<br>88.0047  | C(ii) | - |
| Putative xanthone                | Shikimates and Phenylpropanoids_Xanthones             | C <sub>28</sub> H <sub>30</sub> O <sub>6</sub>   | 19.60 | 461.1964<br>[M-H] <sup>-</sup> | 461.2009<br>[M-H] <sup>-</sup> | -4.5 | 415.1001;<br>253.0480;<br>275.1405                           | C(ii) | - |
| Putative triketide meroterpenoid | Terpenoids& Polyketides_Triketide meroterpenoids      | C <sub>28</sub> H <sub>32</sub> O <sub>9</sub>   | 14.20 | 511.1968<br>[M-H] <sup>-</sup> | 511.2009<br>[M-H] <sup>-</sup> | -4.1 | 421.1874;<br>403.1775;<br>375.1814;<br>369.1350;<br>299.1290 | C(ii) | - |
| Putative terpene glycoside       | Terpene glycosides                                    | C <sub>24</sub> H <sub>32</sub> NO <sub>10</sub> | 14.94 | 494.2026<br>[M] <sup>-</sup>   | 494.2030<br>[M] <sup>-</sup>   | -0.4 | 416.175;<br>369.1549;<br>323.1500                            | C(ii) | - |
| Putative fusarin                 | Terpenoids_Sesquiterpenoids                           | C <sub>23</sub> H <sub>30</sub> NO <sub>7</sub>  | 18.82 | 431.1944<br>[M-H] <sup>-</sup> | 431.1905<br>[M-H] <sup>-</sup> | 3.9  | 416.1710;<br>402.1710;                                       | C(ii) | - |

|                  |                             |                                                 |       |                                |                                |      |                                                                           |       |   |
|------------------|-----------------------------|-------------------------------------------------|-------|--------------------------------|--------------------------------|------|---------------------------------------------------------------------------|-------|---|
|                  |                             |                                                 |       |                                |                                |      | 389.1598;                                                                 |       |   |
|                  |                             |                                                 |       |                                |                                |      | 324.1452;                                                                 |       |   |
|                  |                             |                                                 |       |                                |                                |      | 303.0860                                                                  |       |   |
| Putative fusarin | Terpenoids_Sesquiterpenoids | C <sub>23</sub> H <sub>29</sub> NO <sub>6</sub> | 19.01 | 414.1917<br>[M-H] <sup>+</sup> | 414.1924<br>[M-H] <sup>+</sup> | -0.7 | 387.1815;<br>301.1440;<br>352.21173;<br>213.12711                         | C(ii) | - |
| Putative fusarin | Terpenoids_Sesquiterpenoids | C <sub>23</sub> H <sub>29</sub> NO <sub>7</sub> | 18.56 | 430.1866<br>[M-H] <sup>+</sup> | 430.1873<br>[M-H] <sup>+</sup> | 0.7  | 400.1759;<br>357.1609;<br>320.1550;<br>151.0766;<br>139.0042;<br>138.0199 | C(ii) | - |
| Putative fusarin | Terpenoids_Sesquiterpenoids | C <sub>23</sub> H <sub>29</sub> NO <sub>8</sub> | 16.41 | 446.1815<br>[M-H] <sup>+</sup> | 446.1821<br>[M-H] <sup>+</sup> | -0.6 | 414.1925;<br>400.1767;<br>241.1453                                        | C(ii) | - |
| Putative fusarin | Terpenoids_Sesquiterpenoids | C <sub>23</sub> H <sub>29</sub> NO <sub>9</sub> | 15.50 | 462.1764<br>[M-H] <sup>+</sup> | 462.1770<br>[M-H] <sup>+</sup> | -0.6 | 448.1987;<br>416.1725;<br>323.1037;<br>307.1085;<br>196.0982              | C(ii) | - |
| Putative fusarin | Terpenoids_Sesquiterpenoids | C <sub>23</sub> H <sub>31</sub> NO <sub>7</sub> | 18.24 | 432.2022<br>[M-H] <sup>+</sup> | 432.2029<br>[M-H] <sup>+</sup> | -0.7 | 416.1710;<br>402.1710;<br>389.1598;<br>324.1452;<br>303.087               | C(ii) | - |

|                  |                             |                                                                             |       |                                |                                |      |                                                 |       |   |
|------------------|-----------------------------|-----------------------------------------------------------------------------|-------|--------------------------------|--------------------------------|------|-------------------------------------------------|-------|---|
| Putative fusarin | Terpenoids_Sesquiterpenoids | C <sub>23</sub> H <sub>31</sub> NO <sub>8</sub>                             | 15.12 | 448.1971<br>[M-H] <sup>-</sup> | 448.1977<br>[M-H] <sup>-</sup> | -0.6 | 432.1654;<br>416.1712;<br>167.0717;<br>155.0461 | C(ii) | - |
| Unknown          | -                           | C <sub>20</sub> H <sub>32</sub> O <sub>9</sub>                              | 18.82 | 415.1968<br>[M-H] <sup>-</sup> | 415.1959<br>[M-H] <sup>-</sup> | 0.9  | -                                               | D     | - |
| Unknown          | -                           | C <sub>17</sub> H <sub>24</sub> O <sub>6</sub>                              | 15.50 | 323.1495<br>[M-H] <sup>-</sup> | 323.1502<br>[M-H] <sup>-</sup> | -0.7 | -                                               | D     | - |
| Unknown          | -                           | C <sub>7</sub> H <sub>14</sub> N <sub>2</sub> O <sub>4</sub> S <sub>2</sub> | 7.42  | 253.0317<br>[M-H] <sup>-</sup> | 253.0341<br>[M-H] <sup>-</sup> | -2.4 | -                                               | D     | - |
| Unknown          | -                           | C <sub>16</sub> H <sub>24</sub> O <sub>6</sub>                              | 15.03 | 311.1495<br>[M-H] <sup>-</sup> | 311.1499<br>[M-H] <sup>-</sup> | -0.4 | -                                               | D     | - |
| Unknown          | -                           | C <sub>22</sub> H <sub>36</sub> O <sub>13</sub>                             | 16.63 | 508.2155<br>[M] <sup>-</sup>   | 508.2187<br>[M] <sup>-</sup>   | -3.2 | -                                               | D     | - |
| Unknown          | -                           | C <sub>26</sub> H <sub>36</sub> O <sub>6</sub>                              | 16.50 | 524.2137<br>[M-H] <sup>-</sup> | 524.2137<br>[M-H] <sup>-</sup> | -    | -                                               | D     | - |
| Unknown          | -                           | C <sub>27</sub> H <sub>30</sub> O <sub>6</sub>                              | 15.17 | 449.1964<br>[M-H] <sup>-</sup> | 449.2011<br>[M-H] <sup>-</sup> | -4.7 | -                                               | D     | - |

|         |   |                                                 |       |                                |                                |   |   |   |
|---------|---|-------------------------------------------------|-------|--------------------------------|--------------------------------|---|---|---|
| Unknown | - | C <sub>27</sub> H <sub>35</sub> NO <sub>6</sub> | 19.4  | 468.2386<br>[M-H] <sup>-</sup> | 468.2386<br>[M-H] <sup>-</sup> | - | D | - |
| Unknown | - | -                                               | 3.29  | -                              | 312.0872                       | - | D | - |
| Unknown | - | -                                               | 23.5  | -                              | 600.1905                       | - | D | - |
| Unknown | - | -                                               | 0.17  | -                              | 452.9227                       | - | D | - |
| Unknown | - | -                                               | 14.98 | -                              | 495.2018                       | - | D | - |

\*Confidence levels: Level A: validate metabolite. Comparison with pure standard analysed in the same experimental LC-MS/MS condition; Level B(i): Putative identification using taxonomical information. Confident match based on MS/MS data with reference standard of selected spectral libraries in MSDIAL/MSFINDER analysis (Match Score  $\geq 8$ ) and/or complete match of *in silico* fragmentation of MS/MS data of compounds restricting interrogation to *Colletotrichum* species using MetFrag; Level B(ii): Putative identification. Complete match of *in silico* fragmentation of MS/MS, using MetFrag data restricting interrogation to fungal metabolites. Level C(i): Tentative structure. MS/MS data in agreement with different structural isomers of reference standards of selected database in MSDIAL/MSFINDER belonging to the same natural compound class; Level C(ii): Compound Class. Partial match of MS/MS data on the spectral libraries used in MSDIAL/MSFINDER ( $6 \leq \text{Match Score} < 8$ ) with specific metabolites class and/or MS/MS data in agreement with a specific class of fungal metabolites according to *in silico* fragmentation using MetFrag; Level D: Only molecular formula and/or High-resolution mass.

\*\*Databases identifiers: ID starting with CNPXXX are Coconunt ID: <https://coconut.naturalproducts.net/>; ID starting with NPAXXX are Natural Product Atlas ID: <https://www.npatlas.org/>; ID starting with QXXX are Lotus ID: <https://lotus.naturalproducts.net/>.

Table S4. Metabolites dereplicated by targeted and untargeted metabolomics analysis, organised according to identification level.

|                 |                       | Richard        |                 |                 |                |               | PDA |    |    |                |                | PDB |    |    |                |                | Rice |    |    |                |                |
|-----------------|-----------------------|----------------|-----------------|-----------------|----------------|---------------|-----|----|----|----------------|----------------|-----|----|----|----------------|----------------|------|----|----|----------------|----------------|
| Fungal species  | Legume species tested | N <sup>a</sup> | DA <sup>a</sup> | NR <sup>a</sup> | %DS<br>1 mg/ml | %DS<br>2mg/ml | N   | DA | NR | %DS<br>1 mg/ml | %DS<br>2 mg/ml | N   | DA | NR | %DS<br>1 mg/ml | %DS<br>2 mg/ml | N    | DA | NR | %DS<br>1 mg/ml | %DS<br>2 mg/ml |
| C.              | Lentil                | +              | ++              | +               | 100            | 100           | +   | ++ | +  | 89.7±14.5      | 100            | +   | ++ | +  | 72.8±19.5      | 84.7±14.2      | +    | +  | -  | 23.7±9.6       | 51.8±16*       |
| <i>truncat</i>  | Soybean               | -              | +               | +               | 11.9±5         | 12.2±4.8      | +   | -  | -  | 4.4±1.6        | 4.6±1.9        | +   | -  | -  | 3.4±0.9        | 3.6±1.1        | +    | -  | -  | 7.1±1.5        | 8.5±1.3        |
| <i>um</i>       | Faba bean             | +              | -               | -               | 4.3±2.5        | 9±2.1*        | +   | -  | -  | 4.3±2.1        | 2.9±1          | +   | +  | -  | 2.4±1.6        | 6.4±2.4*       | +    | -  | -  | 11.6±2.3       | 19±4.8*        |
| isolate         | Pea                   | -              | +               | +               | 20.2±8.3       | 26.5±4.8      | +   | +  | -  | 4.4±2.3        | 5.9±2.7        | -   | +  | -  | 4.2±2.3        | 35±14*         | +    | +  | +  | 9.3±4.2        | 8.4±5.9        |
| C428            | Red clover            | -              | +               | +               | 35.5±10.5      | 80.6±16*      | -   | +  | -  | 31±8.9         | 34.4±11.4      | -   | +  | +  | 27.1±6.5       | 28.7±2.8       | -    | +  | +  | 42±13.4        | 72.1±18.5*     |
|                 | White clover          | -              | +               | +               | 35±5.7         | 43.5±7.3*     | -   | +  | +  | 58.7±22        | 51.4±18        | -   | +  | +  | 36.6±7.4       | 35.7±10.4      | -    | +  | +  | 41.3±6.1       | 39.9±3.4       |
|                 | Subterranean clover   | -              | +               | +               | 86.4±12.6      | 89.5±9        | -   | +  | +  | 16.7±2.1       | 44.8±8.5*      | -   | +  | +  | 30.9±3.7       | 32.4±1.8       | +    | +  | +  | 23.9±4.9       | 49.7±11.4*     |
|                 | Barrel medic          | -              | +               | +               | 94.3±6.4       | 100           | -   | +  | -  | 89±12.5        | 93.5±8.4       | -   | +  | +  | 92.8±12        | 100            | -    | +  | +  | 100            | 96.5±4.1       |
| C.              | Lentil                | +              | ++              | +               | 66±24          | 84.4±8.8      | +   | ++ | -  | 100            | 97.6±2.4       | -   | +  | -  | 49.9±11.9      | 47±21.7        | -    | +  | +  | 4.5±2.6        | 7.8±4          |
| <i>truncat</i>  | Soybean               | +              | +               | +               | 6.40±1.3       | 9.48±2.8*     | +   | +  | +  | 9.8±4.7        | 10.5±3         | +   | +  | +  | 8.4±3.6        | 8±3.2          | +    | +  | +  | 5±2.1          | 7.2±1.8        |
| <i>um</i>       | Faba bean             | +              | -               | -               | 5.6±2.3        | 5.9±1.5       | +   | -  | -  | 3.7±0.9        | 4.2±0.1        | +   | -  | -  | 3.5±2          | 3.4±0.2        | +    | -  | -  | 7.1±1.3        | 13.3±5.5*      |
| isolate         | Pea                   | +              | -               | -               | 2.1±1.1        | 1.9±0.6       | -   | +  | -  | 0.98±0.4       | 0.9±0.4        | -   | +  | -  | 6.2±1.1        | 5.4±1.6        | -    | +  | -  | 1.2±0.9        | 3±1.1*         |
| C431            | Red clover            | +              | +               | +               | 33.4±12.5      | 51.8±17*      | -   | +  | -  | 56.6±17        | 61.9±14.7      | -   | +  | +  | 41.5±14        | 85±15*         | +    | +  | +  | 30.6±10.1      | 38.7±12.8      |
|                 | White clover          | +              | +               | +               | 27.6±3.9       | 33.2±5.8      | -   | +  | -  | 43.9±7.5       | 91±8.3*        | -   | +  | +  | 25±13          | 47±14.8*       | -    | +  | +  | 18.1±8.6       | 29±7.8*        |
|                 | Subterranean clover   | -              | +               | +               | 51.3±8         | 54.1±18.2     | -   | +  | -  | 90.8±10        | 98.1±3.3       | -   | +  | +  | 57.4±16.3      | 92.4±11*       | -    | +  | +  | 42.6±11.7      | 86.9±12.2*     |
|                 | Barrel medic          | -              | +               | +               | 93.1±8.1       | 92.7±5.4      | -   | +  | -  | 45.9±14.2      | 44.1±2.3       | -   | +  | -  | 47.8±11.9      | 43.6±0.9       | +    | +  | +  | 92.1±7         | 90.2±5.7       |
| C.              | Lentil                | -              | ++              | +               | 35.4±14.4      | 95.6±4*       | -   | +  | -  | 0.1±0.1        | 4.4±1.6        | +   | +  | -  | 11.5±3.2       | 26.2±4.3*      | -    | +  | -  | 4.7±0.9        | 15.2±2.8*      |
| <i>trifolii</i> | Soybean               | +              | +               | +               | 6.4±1.1        | 9.5±2.8*      | +   | +  | +  | 5.4±1.8        | 5.8±2.3        | -   | +  | +  | 7.2±3.3        | 6±2.5          | +    | -  | -  | 13.2±3         | 10.2±0.7       |
| C436            | Faba bean             | +              | +               | +               | 11.5±2.7       | 17.2±5.8      | +   | -  | -  | 13.2±6.6       | 10.6±1.2       | -   | +  | -  | 6.4±2.8        | 5.9±1.8        | +    | +  | -  | 7.8±3.6        | 46.7±4.7*      |
|                 | Pea                   | +              | +               | +               | 21±10.5        | 57±14.9*      | +   | -  | -  | 2.4±0.9        | 2±0.4          | +   | -  | -  | 1±0.5          | 2.5±0.9        | +    | -  | -  | 3.2±1.4        | 9.6±3.9*       |
|                 | Red clover            | +              | +               | +               | 74.2±17.6      | 83.7±8.7      | -   | +  | +  | 52.1±19        | 46.1±17        | +   | -  | -  | 24.7±9.7       | 21.7±4.5       | +    | +  | +  | 42.9±19.6      | 51.7±17        |

|    |                     |   |   |   |          |          |   |   |   |           |           |   |   |   |           |          |   |   |   |          |          |
|----|---------------------|---|---|---|----------|----------|---|---|---|-----------|-----------|---|---|---|-----------|----------|---|---|---|----------|----------|
|    | White clover        | + | + | + | 53.3±5.6 | 85.3±16* | - | + | + | 16.7±9.3  | 14±3.9    | - | + | + | 9±1.7     | 10.3±3   | + | + | + | 17.7±2.4 | 90±5.7*  |
|    | Subterranean clover | + | + | + | 90.4±8.9 | 88±9.2   | + | + | + | 20±3.9    | 14±5.6    | + | + | + | 37.5±16   | 66±13*   | + | + | + | 51.8±12  | 90.6±9*  |
|    | Barrel medic        | + | + | + | 100      | 100      | - | + | + | 82.7±14.3 | 84.4±13.9 | - | + | + | 39.7±11.7 | 77.5±19* | + | + | + | 45.7±8.1 | 42.1±2.6 |
| CT | Untrated            | - | - | - | 0        | 0        | - | - | - | 0         | 0         | - | - | - | 0         | 0        | - | - | - | 0        | 0        |
|    | Water               | - | - | - | 0        | 0        | - | - | - | 0         | 0         | - | - | - | 0         | 0        | - | - | - | 0        | 0        |
|    | MeOH 5%             | - | - | - | 0        | 0        | - | - | - | 0         | 0         | - | - | - | 0         | 0        | - | - | - | 0        | 0        |

a:(N) necrotic leaf area, (DA) irregular discolored areas surrounded (or not) by a (NR) necrotic ring;

\* %DS at 1 mg/ml and at 2 mg/ml is significantly different ( $p < 0.05$ )
